# Supplementary material
Source: Springer Nature journal article supplement (https://www.springermedizin.de/resource/supplementary/12888_2013_1642_MOESM1_ESM.pdf/9481064)
Supplement: MOESM1 [file 9481064]

Table 1: Topic Guide

|                                                                                                                                                                                                                                                                                                                                                                                                                                                                                                                                              |
|----------------------------------------------------------------------------------------------------------------------------------------------------------------------------------------------------------------------------------------------------------------------------------------------------------------------------------------------------------------------------------------------------------------------------------------------------------------------------------------------------------------------------------------------|
| <p><i>Main questions</i></p> <p>“Can you tell me about your smoking?”<br/>“Have you ever thought about your reasons for smoking?”<br/>“What is the purpose of smoking?”<br/>“What are the effects if you smoke?”<br/>“In your opinion, is there a relationship between symptoms of ADHD and your personal patterns of smoking?”<br/>“If you used prescribed drugs for treatment of ADHD (and/or other mental disorders) now or in the past, did you notice a relationship between your use of these drugs and your patterns of smoking?”</p> |
| <p><i>Additional questions</i></p> <p>“Did you (do you) notice any changes in (your symptoms of ADHD) when you were smoking?”<br/>“If you ever stopped smoking, did it have an effect on you? What kind? For how long?”</p>                                                                                                                                                                                                                                                                                                                  |
| <p><i>Clarifying questions</i></p> <p>“Can you expand a little on this?”<br/>“Can you tell me anything else?”<br/>“Can you give me some examples?”</p>                                                                                                                                                                                                                                                                                                                                                                                       |
